# Supplementary material
Source: publisher figshare collection journal article supplement (https://acs.figshare.com/ndownloader/files/25987862)
Supplement: Supplementary file 1 [file 25987862]

# Supporting Information

## **In-Situ Induced Crystalline-Amorphous Heterophase Junction by K<sup>+</sup> to Improve Photoelectrochemical Water Oxidation of BiVO<sub>4</sub>**

*Dinghua Zhou<sup>a</sup>, Ke Fan<sup>a,\*</sup>, Qiming Zhuo<sup>a</sup>, Yilong Zhao<sup>a</sup>, Licheng Sun<sup>a,b,c</sup>*

*<sup>a</sup> State Key Laboratory of Fine Chemicals, Institute of Artificial Photosynthesis, DUT-KTH Joint Education and Research Centre on Molecular Devices, Institute for Energy Science and Technology, Dalian University of Technology, 116024, Dalian, China*

*<sup>b</sup> Department of Chemistry, KTH Royal Institute of Technology, Stockholm 10044, Sweden.*

*<sup>c</sup> Center of Artificial Photosynthesis for Solar Fuels, School of Science, Westlake University, 310024 Hangzhou, China*

*\*Corresponding author*

*Email: kefan@kth.se*

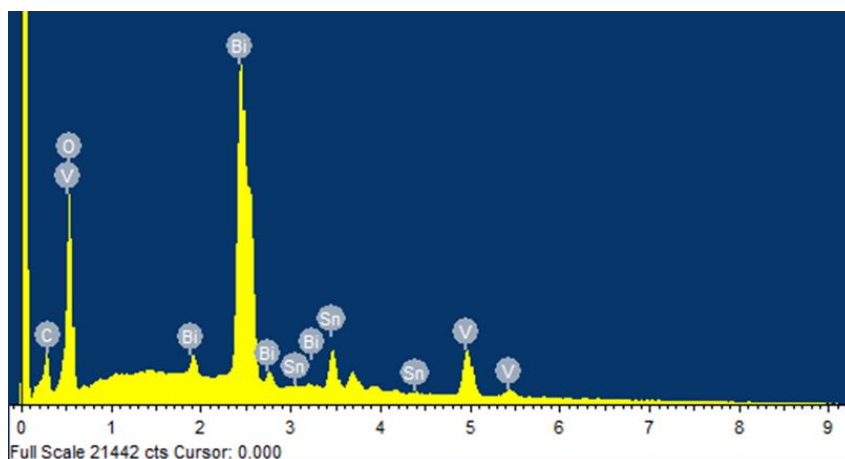

Figure S1. The original sum spectrum of EDS in SEM for K-BiVO<sub>4</sub>.

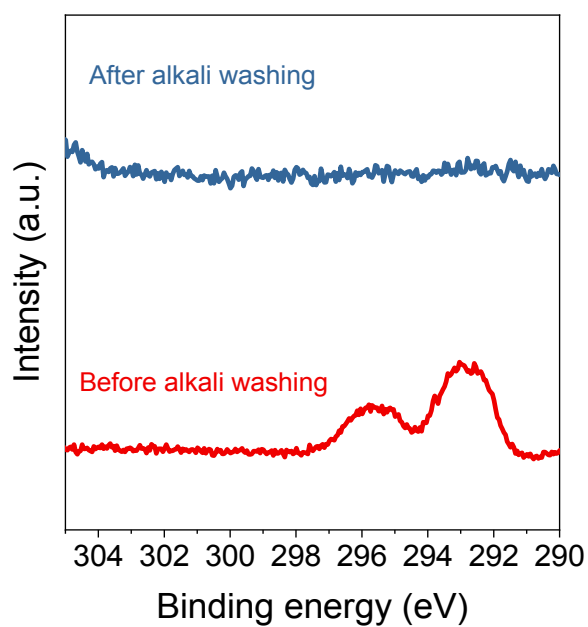

Figure S2. the XPS of K 2p for K-BiVO<sub>4</sub> samples before and after alkali washing.

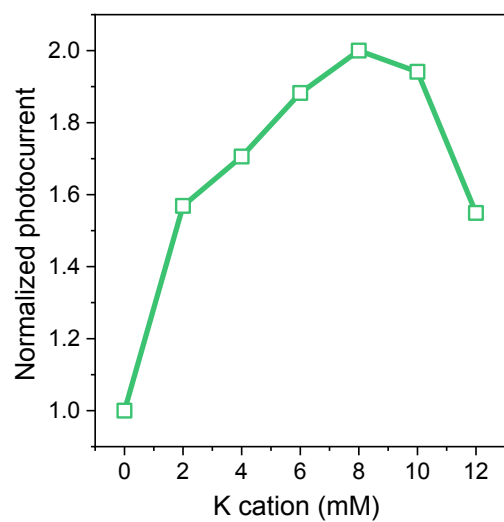

Figure S3. Effect of the K cation addition in the precursor solution on the photocurrent of  $\text{BiVO}_4$  photoanodes (at 1.23 V vs. RHE).

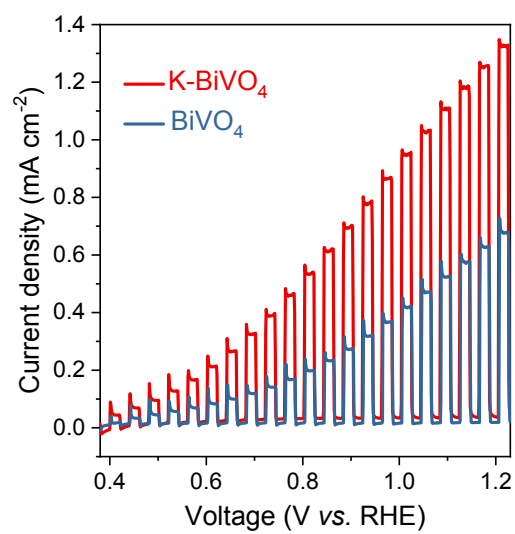

Figure S4. LSV curves with the chopped-light illumination.

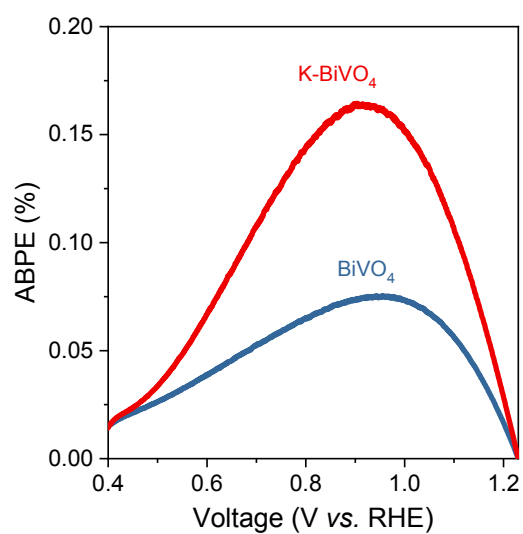

Figure S5. ABPE of the photoelectrodes

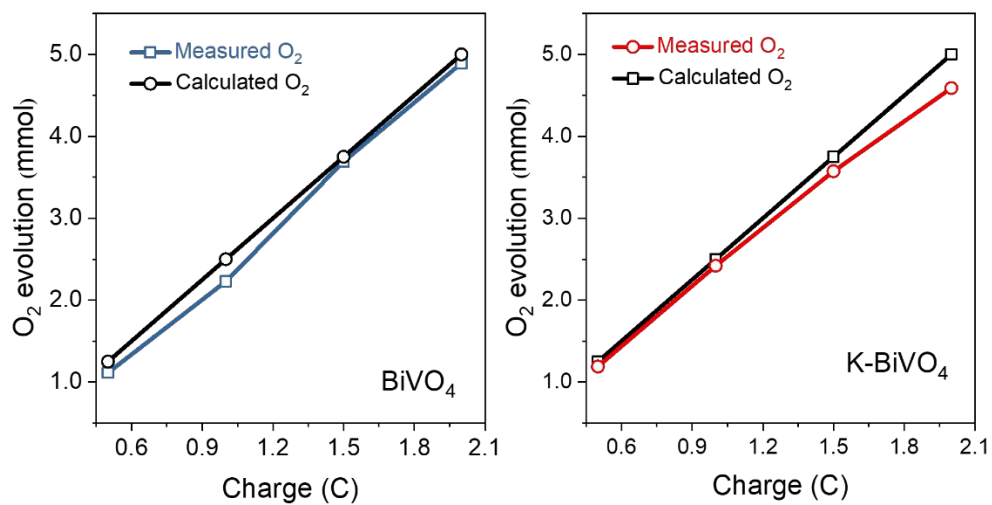

Figure S6. Measurement of O<sub>2</sub> evolution of the photoanodes for the determination of Faradaic efficiency

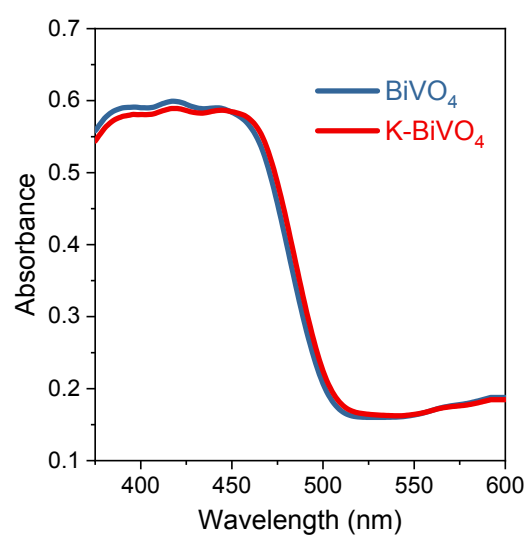

Figure S7. UV-Vis absorption spectra of the photoanodes.

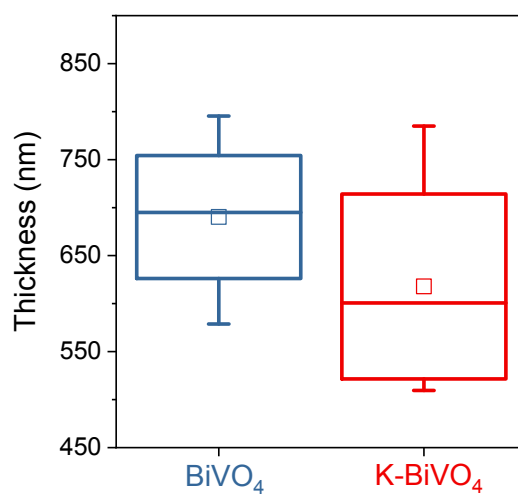

Figure S8. Film thickness of the photoanodes. Data are based on 15 samples for each photoanode.

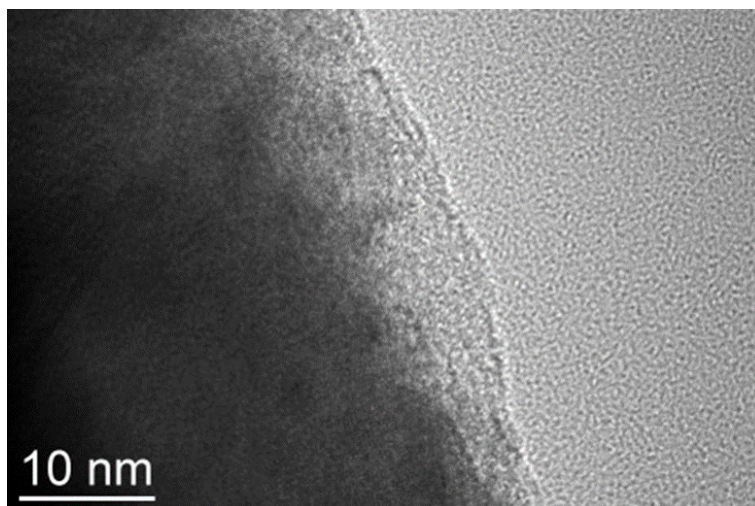

Figure S9. TEM image of K-BiVO<sub>4</sub> after a long-term test.

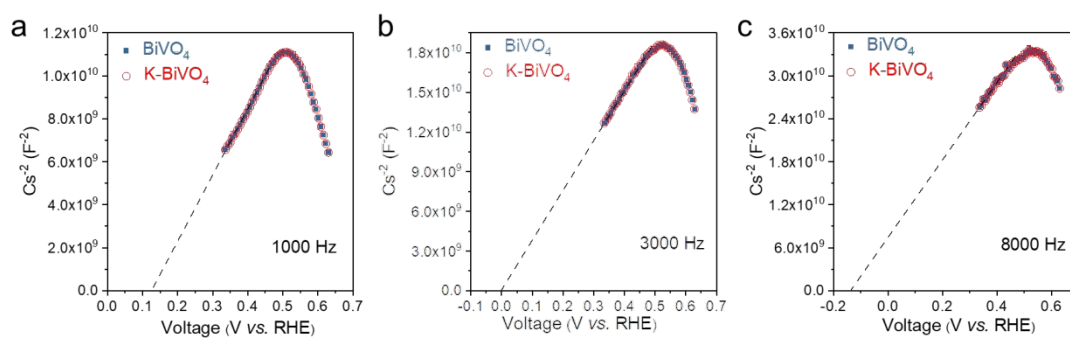

Figure S10. Mott-Schottky plots of the photoanodes under different frequencies.

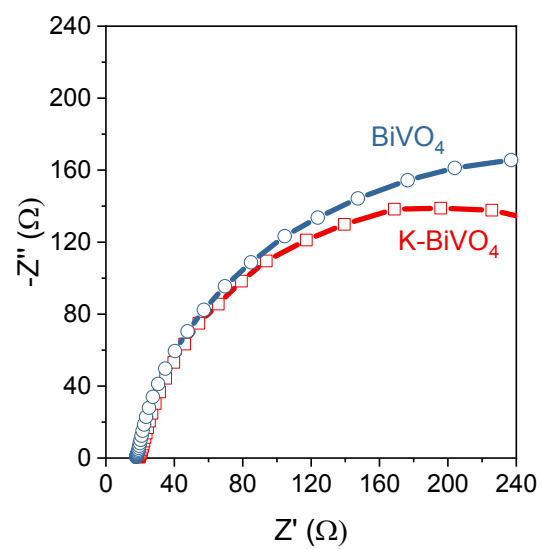

Figure S11. Nyquist plots of the photoanodes under 1.23 V vs. RHE with illumination.
